# Supplementary material for: Asymmetric dinuclear copper(i) complexes of bis-(2-(2-pyridyl)ethyl)-2-(N-toluenesulfonylamino)ethylamine with short copper–copper distances
Source: Royal Society of Chemistry journal article supplement (doi:10.1039/b705684b), 2007-01-01

Electronic Supplementary Information for Dalton Transactions  
This journal is © The Royal Society of Chemistry 2007

## **Supporting Information**

### **Asymmetric Dinuclear Copper(I) Complexes of bis-(2-(2-pyridyl)ethyl)-2-(N-toluenesulfonylamino)ethylamine with Short Copper-Copper Distances.**

Jocelyn M. Goodwin, Pin-Chieh Chiang, Marcin Brynda, Katerina Penkina, Marilyn M. Olmstead, and Timothy E. Patten\*

#### **Contents:**

Pages 2-33: X-ray Crystallography Data Tables for Complexes-**1** to -**3**

Pages 34-36: Molecular orbital plots for the LUMO and top 11 HOMOs from the DFT calculations performed on Complex-**1**

**Table D.1.1.** Crystal data and structure refinement for Cu(PETAEA)-CuCl.

|                                    |                                                                                    |                        |
|------------------------------------|------------------------------------------------------------------------------------|------------------------|
| Identification code                | mn1530                                                                             |                        |
| Empirical formula                  | C <sub>23</sub> H <sub>27</sub> Cl Cu <sub>2</sub> N <sub>4</sub> O <sub>2</sub> S |                        |
| Formula weight                     | 586.08                                                                             |                        |
| Temperature                        | 93(2) K                                                                            |                        |
| Wavelength                         | 0.71073 Å                                                                          |                        |
| Crystal system                     | Triclinic                                                                          |                        |
| Space group                        | P $\bar{1}$                                                                        |                        |
| Unit cell dimensions               | a = 9.1111(6) Å                                                                    | $\alpha$ = 68.776(3)°. |
|                                    | b = 10.8627(7) Å                                                                   | $\beta$ = 84.102(3)°.  |
|                                    | c = 13.4127(9) Å                                                                   | $\gamma$ = 87.524(3)°. |
| Volume                             | 1230.86(14) Å <sup>3</sup>                                                         |                        |
| Z                                  | 2                                                                                  |                        |
| Density (calculated)               | 1.581 Mg/m <sup>3</sup>                                                            |                        |
| Absorption coefficient             | 1.949 mm <sup>-1</sup>                                                             |                        |
| F(000)                             | 600                                                                                |                        |
| Crystal size                       | 0.34 x 0.10 x 0.06 mm <sup>3</sup>                                                 |                        |
| Crystal color and habit            | pale-yellow needle                                                                 |                        |
| Diffractometer                     | Bruker SMART 1000                                                                  |                        |
| $\Theta$ range for data collection | 1.64 to 27.48°.                                                                    |                        |
| Index ranges                       | -11 ≤ h ≤ 11, -12 ≤ k ≤ 14, -17 ≤ l ≤ 17                                           |                        |
| Reflections collected              | 13798                                                                              |                        |
| Independent reflections            | 5612 [R(int) = 0.0232]                                                             |                        |
| Observed reflections (I > 2σ(I))   | 4922                                                                               |                        |
| Completeness to $\Theta$ = 27.48°  | 99.8 %                                                                             |                        |
| Absorption correction              | Semi-empirical from equivalents                                                    |                        |
| Max. and min. transmission         | 0.892 and 0.557                                                                    |                        |
| Solution method                    | SHELXS-97 (Sheldrick, 1990)                                                        |                        |
| Refinement method                  | SHELXL-97 (Sheldrick, 1997)                                                        |                        |
| Data / restraints / parameters     | 5612 / 0 / 299                                                                     |                        |
| Goodness-of-fit on F <sup>2</sup>  | 1.043                                                                              |                        |
| Final R indices [I > 2σ(I)]        | R1 = 0.0241, wR2 = 0.0599                                                          |                        |
| R indices (all data)               | R1 = 0.0307, wR2 = 0.0646                                                          |                        |
| Largest diff. peak and hole        | 0.503 and -0.321 e.Å <sup>-3</sup>                                                 |                        |

**Table D.1.2.** Atomic coordinates ( $\times 10^4$ ) and equivalent isotropic displacement parameters ( $\text{\AA}^2 \times 10^3$ ) for Cu(PETAEA)-CuCl.  $U(\text{eq})$  is defined as one third of the trace of the orthogonalized  $U^{ij}$  tensor.

|       | x       | y       | z       | U(eq) |
|-------|---------|---------|---------|-------|
| Cu(1) | 3820(1) | 4455(1) | 3148(1) | 13(1) |
| Cu(2) | 6489(1) | 4386(1) | 2106(1) | 14(1) |
| Cl(1) | 7978(1) | 2837(1) | 2136(1) | 21(1) |
| S(1)  | 5812(1) | 7015(1) | 2240(1) | 14(1) |
| O(1)  | 4657(1) | 7918(1) | 2364(1) | 20(1) |
| O(2)  | 6678(1) | 6378(1) | 3135(1) | 18(1) |
| N(1)  | 3782(2) | 2554(1) | 4035(1) | 15(1) |
| N(2)  | 2564(2) | 4477(1) | 1854(1) | 14(1) |
| N(3)  | 2366(2) | 5447(1) | 3866(1) | 15(1) |
| N(4)  | 5181(2) | 5852(1) | 1924(1) | 13(1) |
| C(1)  | 3713(2) | 2165(2) | 5116(2) | 19(1) |
| C(2)  | 3317(2) | 909(2)  | 5800(2) | 27(1) |
| C(3)  | 2965(3) | -2(2)   | 5360(2) | 35(1) |
| C(4)  | 3038(3) | 381(2)  | 4255(2) | 30(1) |
| C(5)  | 3451(2) | 1664(2) | 3601(2) | 18(1) |
| C(6)  | 3510(2) | 2121(2) | 2395(2) | 18(1) |
| C(7)  | 2284(2) | 3112(2) | 1911(2) | 18(1) |
| C(8)  | 1151(2) | 5201(2) | 1846(1) | 17(1) |
| C(9)  | 391(2)  | 4906(2) | 2982(1) | 17(1) |
| C(10) | 962(2)  | 5682(2) | 3594(1) | 15(1) |
| C(11) | 57(2)   | 6586(2) | 3887(2) | 19(1) |
| C(12) | 583(2)  | 7229(2) | 4502(2) | 21(1) |
| C(13) | 1990(2) | 6939(2) | 4827(2) | 20(1) |
| C(14) | 2846(2) | 6062(2) | 4481(1) | 17(1) |
| C(15) | 3545(2) | 5172(2) | 879(1)  | 15(1) |
| C(16) | 4297(2) | 6337(2) | 982(1)  | 15(1) |
| C(17) | 7028(2) | 7942(2) | 1117(1) | 15(1) |
| C(18) | 6672(2) | 9235(2) | 509(2)  | 22(1) |
| C(19) | 7587(2) | 9925(2) | -408(2) | 25(1) |
| C(20) | 8867(2) | 9354(2) | -716(2) | 18(1) |
| C(21) | 9222(2) | 8064(2) | -76(2)  | 17(1) |
| C(22) | 8305(2) | 7354(2) | 830(1)  | 16(1) |

C(23)

9835(2)

10098(2)

-1720(2)

25(1)

---

**Table D.1.3.** Bond lengths [Å] and angles [°] for Cu(PETAEA)-CuCl.

|                  |            |                   |             |
|------------------|------------|-------------------|-------------|
| Cu(1)-N(1)       | 1.9755(15) | C(2)-C(3)         | 1.386(3)    |
| Cu(1)-N(3)       | 2.0517(15) | C(3)-C(4)         | 1.383(3)    |
| Cu(1)-N(4)       | 2.1158(14) | C(4)-C(5)         | 1.395(3)    |
| Cu(1)-N(2)       | 2.1671(15) | C(5)-C(6)         | 1.506(3)    |
| Cu(1)-Cu(2)      | 2.6903(3)  | C(6)-C(7)         | 1.539(3)    |
| Cu(2)-N(4)       | 1.9054(15) | C(8)-C(9)         | 1.534(2)    |
| Cu(2)-Cl(1)      | 2.1060(5)  | C(9)-C(10)        | 1.511(2)    |
| S(1)-O(2)        | 1.4456(13) | C(10)-C(11)       | 1.393(3)    |
| S(1)-O(1)        | 1.4454(13) | C(11)-C(12)       | 1.387(3)    |
| S(1)-N(4)        | 1.6148(14) | C(12)-C(13)       | 1.383(3)    |
| S(1)-C(17)       | 1.7788(18) | C(13)-C(14)       | 1.383(3)    |
| N(1)-C(1)        | 1.350(2)   | C(15)-C(16)       | 1.520(2)    |
| N(1)-C(5)        | 1.355(2)   | C(17)-C(18)       | 1.389(3)    |
| N(2)-C(15)       | 1.477(2)   | C(17)-C(22)       | 1.390(3)    |
| N(2)-C(8)        | 1.478(2)   | C(18)-C(19)       | 1.395(3)    |
| N(2)-C(7)        | 1.488(2)   | C(19)-C(20)       | 1.393(3)    |
| N(3)-C(14)       | 1.347(2)   | C(20)-C(21)       | 1.397(3)    |
| N(3)-C(10)       | 1.355(2)   | C(20)-C(23)       | 1.508(3)    |
| N(4)-C(16)       | 1.487(2)   | C(21)-C(22)       | 1.392(2)    |
| C(1)-C(2)        | 1.379(3)   |                   |             |
|                  |            |                   |             |
| N(1)-Cu(1)-N(3)  | 109.29(6)  | Cl(1)-Cu(2)-Cu(1) | 132.872(16) |
| N(1)-Cu(1)-N(4)  | 140.05(6)  | O(2)-S(1)-O(1)    | 117.83(8)   |
| N(3)-Cu(1)-N(4)  | 108.60(6)  | O(2)-S(1)-N(4)    | 106.49(8)   |
| N(1)-Cu(1)-N(2)  | 100.75(6)  | O(1)-S(1)-N(4)    | 111.67(8)   |
| N(3)-Cu(1)-N(2)  | 99.48(6)   | O(2)-S(1)-C(17)   | 108.12(8)   |
| N(4)-Cu(1)-N(2)  | 85.04(5)   | O(1)-S(1)-C(17)   | 106.27(8)   |
| N(1)-Cu(1)-Cu(2) | 95.31(4)   | N(4)-S(1)-C(17)   | 105.80(8)   |
| N(3)-Cu(1)-Cu(2) | 147.84(4)  | C(1)-N(1)-C(5)    | 118.36(15)  |
| N(4)-Cu(1)-Cu(2) | 44.76(4)   | C(1)-N(1)-Cu(1)   | 119.84(12)  |
| N(2)-Cu(1)-Cu(2) | 95.77(4)   | C(5)-N(1)-Cu(1)   | 119.71(12)  |
| N(4)-Cu(2)-Cl(1) | 174.18(5)  | C(15)-N(2)-C(8)   | 110.27(14)  |
| N(4)-Cu(2)-Cu(1) | 51.43(4)   | C(15)-N(2)-C(7)   | 109.95(14)  |

|                  |            |                   |            |
|------------------|------------|-------------------|------------|
| C(8)-N(2)-C(7)   | 109.85(14) | N(2)-C(8)-C(9)    | 112.07(14) |
| C(15)-N(2)-Cu(1) | 103.30(10) | C(10)-C(9)-C(8)   | 114.99(15) |
| C(8)-N(2)-Cu(1)  | 112.10(11) | N(3)-C(10)-C(11)  | 121.41(17) |
| C(7)-N(2)-Cu(1)  | 111.20(11) | N(3)-C(10)-C(9)   | 117.79(16) |
| C(14)-N(3)-C(10) | 118.10(16) | C(11)-C(10)-C(9)  | 120.78(16) |
| C(14)-N(3)-Cu(1) | 120.49(12) | C(12)-C(11)-C(10) | 119.51(18) |
| C(10)-N(3)-Cu(1) | 120.54(12) | C(13)-C(12)-C(11) | 119.11(18) |
| C(16)-N(4)-S(1)  | 113.83(11) | C(12)-C(13)-C(14) | 118.37(18) |
| C(16)-N(4)-Cu(2) | 120.19(11) | N(3)-C(14)-C(13)  | 123.36(18) |
| S(1)-N(4)-Cu(2)  | 114.28(8)  | N(2)-C(15)-C(16)  | 111.35(14) |
| C(16)-N(4)-Cu(1) | 105.04(10) | N(4)-C(16)-C(15)  | 109.15(14) |
| S(1)-N(4)-Cu(1)  | 115.63(8)  | C(18)-C(17)-C(22) | 120.26(17) |
| Cu(2)-N(4)-Cu(1) | 83.81(5)   | C(18)-C(17)-S(1)  | 119.87(14) |
| N(1)-C(1)-C(2)   | 123.32(17) | C(22)-C(17)-S(1)  | 119.83(13) |
| C(1)-C(2)-C(3)   | 118.58(19) | C(17)-C(18)-C(19) | 119.37(18) |
| C(4)-C(3)-C(2)   | 118.72(19) | C(20)-C(19)-C(18) | 121.37(18) |
| C(3)-C(4)-C(5)   | 120.25(19) | C(19)-C(20)-C(21) | 118.19(17) |
| N(1)-C(5)-C(4)   | 120.77(17) | C(19)-C(20)-C(23) | 121.01(17) |
| N(1)-C(5)-C(6)   | 117.61(16) | C(21)-C(20)-C(23) | 120.80(18) |
| C(4)-C(5)-C(6)   | 121.60(17) | C(22)-C(21)-C(20) | 121.10(17) |
| C(5)-C(6)-C(7)   | 113.89(16) | C(17)-C(22)-C(21) | 119.68(16) |
| N(2)-C(7)-C(6)   | 113.53(14) |                   |            |

---

**Table D.1.4.** Anisotropic displacement parameters ( $\text{\AA}^2 \times 10^3$ ) for Cu(PETAEA)-CuCl. The anisotropic displacement factor exponent takes the form:  $-2\pi^2 [ h^2 a^{*2} U^{11} + \dots + 2 h k a^* b^* U^{12} ]$

|       | $U^{11}$ | $U^{22}$ | $U^{33}$ | $U^{23}$ | $U^{13}$ | $U^{12}$ |
|-------|----------|----------|----------|----------|----------|----------|
| Cu(1) | 14(1)    | 14(1)    | 12(1)    | -5(1)    | -1(1)    | -2(1)    |
| Cu(2) | 13(1)    | 14(1)    | 16(1)    | -5(1)    | -1(1)    | 1(1)     |
| Cl(1) | 19(1)    | 18(1)    | 25(1)    | -7(1)    | -1(1)    | 4(1)     |
| S(1)  | 13(1)    | 15(1)    | 15(1)    | -6(1)    | 0(1)     | -1(1)    |
| O(1)  | 18(1)    | 18(1)    | 25(1)    | -10(1)   | 3(1)     | 0(1)     |
| O(2)  | 19(1)    | 22(1)    | 15(1)    | -7(1)    | -3(1)    | -2(1)    |
| N(1)  | 15(1)    | 15(1)    | 15(1)    | -6(1)    | -1(1)    | 0(1)     |
| N(2)  | 14(1)    | 16(1)    | 13(1)    | -6(1)    | 1(1)     | -2(1)    |
| N(3)  | 15(1)    | 16(1)    | 13(1)    | -5(1)    | 1(1)     | -1(1)    |
| N(4)  | 13(1)    | 13(1)    | 13(1)    | -5(1)    | -2(1)    | 0(1)     |
| C(1)  | 23(1)    | 19(1)    | 17(1)    | -8(1)    | -3(1)    | -1(1)    |
| C(2)  | 40(1)    | 22(1)    | 15(1)    | -4(1)    | -2(1)    | -3(1)    |
| C(3)  | 61(2)    | 18(1)    | 23(1)    | -2(1)    | -2(1)    | -12(1)   |
| C(4)  | 50(1)    | 17(1)    | 23(1)    | -8(1)    | -2(1)    | -8(1)    |
| C(5)  | 21(1)    | 17(1)    | 18(1)    | -7(1)    | -2(1)    | 0(1)     |
| C(6)  | 23(1)    | 16(1)    | 16(1)    | -8(1)    | 0(1)     | -3(1)    |
| C(7)  | 20(1)    | 20(1)    | 16(1)    | -8(1)    | -2(1)    | -5(1)    |
| C(8)  | 14(1)    | 23(1)    | 14(1)    | -7(1)    | -2(1)    | -1(1)    |
| C(9)  | 14(1)    | 23(1)    | 15(1)    | -7(1)    | 0(1)     | -2(1)    |
| C(10) | 16(1)    | 16(1)    | 11(1)    | -2(1)    | 2(1)     | -2(1)    |
| C(11) | 18(1)    | 19(1)    | 16(1)    | -2(1)    | 2(1)     | 1(1)     |
| C(12) | 28(1)    | 15(1)    | 18(1)    | -5(1)    | 6(1)     | 1(1)     |
| C(13) | 28(1)    | 17(1)    | 16(1)    | -8(1)    | 4(1)     | -5(1)    |
| C(14) | 18(1)    | 19(1)    | 14(1)    | -5(1)    | 1(1)     | -4(1)    |
| C(15) | 16(1)    | 19(1)    | 12(1)    | -6(1)    | 0(1)     | -3(1)    |
| C(16) | 14(1)    | 16(1)    | 13(1)    | -4(1)    | -2(1)    | -1(1)    |
| C(17) | 14(1)    | 15(1)    | 15(1)    | -6(1)    | -2(1)    | -3(1)    |
| C(18) | 19(1)    | 17(1)    | 28(1)    | -7(1)    | 1(1)     | 2(1)     |
| C(19) | 27(1)    | 15(1)    | 26(1)    | 0(1)     | -2(1)    | 1(1)     |
| C(20) | 22(1)    | 18(1)    | 17(1)    | -6(1)    | -2(1)    | -7(1)    |
| C(21) | 14(1)    | 19(1)    | 18(1)    | -8(1)    | 0(1)     | -1(1)    |
| C(22) | 16(1)    | 14(1)    | 17(1)    | -5(1)    | -2(1)    | -1(1)    |

C(23)    31(1)    22(1)    20(1)    -3(1)    3(1)    -8(1)

---



**Table D.1.5.** Hydrogen coordinates ( $\times 10^4$ ) and isotropic displacement parameters ( $\text{\AA}^2 \times 10^{-3}$ ) for Cu(PETAEA)-CuCl.

|        | x     | y     | z     | U(eq) |
|--------|-------|-------|-------|-------|
| H(1)   | 3948  | 2789  | 5420  | 23    |
| H(2)   | 3287  | 674   | 6556  | 32    |
| H(3)   | 2679  | -873  | 5810  | 42    |
| H(4)   | 2805  | -232  | 3939  | 36    |
| H(6A)  | 3436  | 1342  | 2186  | 22    |
| H(6B)  | 4479  | 2536  | 2083  | 22    |
| H(7A)  | 2179  | 3132  | 1178  | 22    |
| H(7B)  | 1338  | 2802  | 2351  | 22    |
| H(8A)  | 486   | 4953  | 1411  | 20    |
| H(8B)  | 1337  | 6161  | 1503  | 20    |
| H(9A)  | -678  | 5089  | 2929  | 21    |
| H(9B)  | 508   | 3952  | 3400  | 21    |
| H(11)  | -913  | 6760  | 3667  | 23    |
| H(12)  | -15   | 7859  | 4696  | 25    |
| H(13)  | 2359  | 7333  | 5278  | 24    |
| H(14)  | 3822  | 5883  | 4688  | 21    |
| H(15A) | 2961  | 5490  | 250   | 18    |
| H(15B) | 4304  | 4548  | 757   | 18    |
| H(16A) | 4948  | 6785  | 321   | 18    |
| H(16B) | 3546  | 6981  | 1078  | 18    |
| H(18)  | 5813  | 9646  | 716   | 26    |
| H(19)  | 7332  | 10803 | -832  | 30    |
| H(21)  | 10104 | 7665  | -262  | 20    |
| H(22)  | 8550  | 6471  | 1249  | 19    |
| H(23A) | 9234  | 10739 | -2237 | 38    |
| H(23B) | 10294 | 9475  | -2037 | 38    |
| H(23C) | 10604 | 10563 | -1539 | 38    |

**Table D.2.1.** Crystal data and structure refinement for Cu(PEMAEA)-CuCl.

|                                    |                                                                                    |                         |
|------------------------------------|------------------------------------------------------------------------------------|-------------------------|
| Identification code                | mn1588                                                                             |                         |
| Empirical formula                  | C <sub>23</sub> H <sub>27</sub> Cl Cu <sub>2</sub> N <sub>4</sub> O <sub>3</sub> S |                         |
| Formula weight                     | 602.08                                                                             |                         |
| Temperature                        | 133(2) K                                                                           |                         |
| Wavelength                         | 1.54178 Å                                                                          |                         |
| Crystal system                     | Triclinic                                                                          |                         |
| Space group                        | P $\bar{1}$                                                                        |                         |
| Unit cell dimensions               | a = 9.5617(12) Å                                                                   | $\alpha$ = 92.187(8)°.  |
|                                    | b = 9.9875(10) Å                                                                   | $\beta$ = 91.981(9)°.   |
|                                    | c = 13.4720(12) Å                                                                  | $\gamma$ = 108.049(8)°. |
| Volume                             | 1220.9(2) Å <sup>3</sup>                                                           |                         |
| Z                                  | 2                                                                                  |                         |
| Density (calculated)               | 1.638 Mg/m <sup>3</sup>                                                            |                         |
| Absorption coefficient             | 4.233 mm <sup>-1</sup>                                                             |                         |
| F(000)                             | 616                                                                                |                         |
| Crystal size                       | 0.56 x 0.40 x 0.08 mm <sup>3</sup>                                                 |                         |
| Crystal color and habit            | yellow plate                                                                       |                         |
| Diffractometer                     | Siemens P4                                                                         |                         |
| $\Theta$ range for data collection | 3.29 to 56.09°.                                                                    |                         |
| Index ranges                       | -2 ≤ h ≤ 10, -10 ≤ k ≤ 10, -14 ≤ l ≤ 14                                            |                         |
| Reflections collected              | 4351                                                                               |                         |
| Independent reflections            | 3203 [R(int) = 0.0479]                                                             |                         |
| Observed reflections (I > 2σ(I))   | 3044                                                                               |                         |
| Completeness to $\Theta$ = 56.09°  | 100.0 %                                                                            |                         |
| Absorption correction              | Empirical                                                                          |                         |
| Max. and min. transmission         | 0.7282 and 0.2003                                                                  |                         |
| Solution method                    | SHELXS97 (Sheldrick, 1990)                                                         |                         |
| Refinement method                  | SHELXL97 (Sheldrick, 1997)                                                         |                         |
| Data / restraints / parameters     | 3203 / 0 / 309                                                                     |                         |
| Goodness-of-fit on F <sup>2</sup>  | 1.108                                                                              |                         |
| Final R indices [I > 2σ(I)]        | R1 = 0.0628, wR2 = 0.1676                                                          |                         |
| R indices (all data)               | R1 = 0.0643, wR2 = 0.1700                                                          |                         |
| Extinction coefficient             | 0.0086(10)                                                                         |                         |
| Largest diff. peak and hole        | 1.642 and -1.446 e.Å <sup>-3</sup>                                                 |                         |

**Table D.2.2.** Atomic coordinates ( $\times 10^4$ ) and equivalent isotropic displacement parameters ( $\text{\AA}^2 \times 10^3$ ) for Cu(PEMAEA)-CuCl.  $U(\text{eq})$  is defined as one third of the trace of the orthogonalized  $U^{ij}$  tensor.

|       | x       | y        | z        | U(eq) |
|-------|---------|----------|----------|-------|
| Cu(1) | 3924(1) | 2456(1)  | 2208(1)  | 18(1) |
| Cu(2) | 2836(1) | 3628(1)  | 3672(1)  | 20(1) |
| Cl(1) | 2584(1) | 3217(1)  | 5181(1)  | 30(1) |
| S(1)  | 1263(1) | 3779(1)  | 1814(1)  | 19(1) |
| O(1)  | 1243(3) | 3636(3)  | 750(2)   | 28(1) |
| O(2)  | 272(3)  | 2648(3)  | 2318(2)  | 26(1) |
| O(3)  | -18(4)  | 9136(3)  | 2627(3)  | 33(1) |
| N(1)  | 4649(4) | 1275(4)  | 3126(3)  | 20(1) |
| N(2)  | 5925(4) | 4158(4)  | 2046(3)  | 21(1) |
| N(3)  | 3632(4) | 1559(4)  | 791(3)   | 24(1) |
| N(4)  | 2882(4) | 4050(4)  | 2308(3)  | 19(1) |
| C(1)  | 4038(5) | -143(5)  | 3076(3)  | 24(1) |
| C(2)  | 4674(5) | -1035(5) | 3534(4)  | 29(1) |
| C(3)  | 6013(6) | -475(5)  | 4029(4)  | 32(1) |
| C(4)  | 6664(5) | 968(5)   | 4075(4)  | 30(1) |
| C(5)  | 5954(5) | 1835(5)  | 3633(3)  | 21(1) |
| C(6)  | 6609(5) | 3404(5)  | 3703(3)  | 26(1) |
| C(7)  | 7143(5) | 4065(5)  | 2734(4)  | 26(1) |
| C(8)  | 6359(5) | 4184(5)  | 1006(3)  | 24(1) |
| C(9)  | 6246(5) | 2722(5)  | 556(4)   | 30(1) |
| C(10) | 4735(5) | 1836(5)  | 160(3)   | 25(1) |
| C(11) | 4494(6) | 1314(5)  | -815(4)  | 33(1) |
| C(12) | 3121(7) | 489(5)   | -1160(4) | 40(1) |
| C(13) | 2002(6) | 178(5)   | -506(4)  | 36(1) |
| C(14) | 2294(5) | 729(5)   | 453(4)   | 27(1) |
| C(15) | 5524(5) | 5430(4)  | 2320(3)  | 21(1) |
| C(16) | 3980(5) | 5304(5)  | 1919(3)  | 21(1) |
| C(17) | 850(4)  | 5372(4)  | 2101(3)  | 19(1) |
| C(18) | 499(5)  | 6120(5)  | 1327(3)  | 21(1) |
| C(19) | 191(5)  | 7354(5)  | 1532(3)  | 23(1) |
| C(20) | 236(5)  | 7864(5)  | 2512(4)  | 23(1) |
| C(21) | 565(5)  | 7118(5)  | 3293(3)  | 23(1) |

|       |        |         |         |       |
|-------|--------|---------|---------|-------|
| C(22) | 854(4) | 5853(4) | 3072(3) | 19(1) |
| C(23) | 146(6) | 9788(5) | 3611(4) | 32(1) |

---

**Table D.2.3.** Bond lengths [Å] and angles [°] for Cu(PEMAEA)-CuCl.

|             |            |              |          |
|-------------|------------|--------------|----------|
| Cu(1)-N(1)  | 1.990(4)   | C(7)-H(7B)   | 0.9900   |
| Cu(1)-N(3)  | 2.050(4)   | C(8)-C(9)    | 1.530(7) |
| Cu(1)-N(4)  | 2.126(3)   | C(8)-H(8A)   | 0.9900   |
| Cu(1)-N(2)  | 2.154(3)   | C(8)-H(8B)   | 0.9900   |
| Cu(1)-Cu(2) | 2.6572(8)  | C(9)-C(10)   | 1.508(7) |
| Cu(2)-N(4)  | 1.900(3)   | C(9)-H(9A)   | 0.9900   |
| Cu(2)-Cl(1) | 2.0960(12) | C(9)-H(9B)   | 0.9900   |
| S(1)-O(1)   | 1.434(3)   | C(10)-C(11)  | 1.380(7) |
| S(1)-O(2)   | 1.440(3)   | C(11)-C(12)  | 1.370(8) |
| S(1)-N(4)   | 1.602(3)   | C(11)-H(11)  | 0.9500   |
| S(1)-C(17)  | 1.786(4)   | C(12)-C(13)  | 1.377(8) |
| O(3)-C(20)  | 1.370(6)   | C(12)-H(12)  | 0.9500   |
| O(3)-C(23)  | 1.436(6)   | C(13)-C(14)  | 1.370(7) |
| N(1)-C(5)   | 1.348(6)   | C(13)-H(13)  | 0.9500   |
| N(1)-C(1)   | 1.353(6)   | C(14)-H(14)  | 0.9500   |
| N(2)-C(15)  | 1.474(6)   | C(15)-C(16)  | 1.519(6) |
| N(2)-C(8)   | 1.475(6)   | C(15)-H(15A) | 0.9900   |
| N(2)-C(7)   | 1.491(6)   | C(15)-H(15B) | 0.9900   |
| N(3)-C(10)  | 1.345(6)   | C(16)-H(16A) | 0.9900   |
| N(3)-C(14)  | 1.344(6)   | C(16)-H(16B) | 0.9900   |
| N(4)-C(16)  | 1.489(6)   | C(17)-C(22)  | 1.376(6) |
| C(1)-C(2)   | 1.376(7)   | C(17)-C(18)  | 1.396(6) |
| C(1)-H(1)   | 0.9500     | C(18)-C(19)  | 1.373(7) |
| C(2)-C(3)   | 1.366(7)   | C(18)-H(18)  | 0.9500   |
| C(2)-H(2)   | 0.9500     | C(19)-C(20)  | 1.391(7) |
| C(3)-C(4)   | 1.379(8)   | C(19)-H(19)  | 0.9500   |
| C(3)-H(3)   | 0.9500     | C(20)-C(21)  | 1.393(7) |
| C(4)-C(5)   | 1.393(7)   | C(21)-C(22)  | 1.398(6) |
| C(4)-H(4)   | 0.9500     | C(21)-H(21)  | 0.9500   |
| C(5)-C(6)   | 1.495(7)   | C(22)-H(22)  | 0.9500   |
| C(6)-C(7)   | 1.518(7)   | C(23)-H(23A) | 0.9800   |
| C(6)-H(6A)  | 0.9900     | C(23)-H(23B) | 0.9800   |
| C(6)-H(6B)  | 0.9900     | C(23)-H(23C) | 0.9800   |
| C(7)-H(7A)  | 0.9900     |              |          |

|                   |            |                  |            |
|-------------------|------------|------------------|------------|
| N(1)-Cu(1)-N(3)   | 109.96(14) | S(1)-N(4)-Cu(2)  | 112.00(19) |
| N(1)-Cu(1)-N(4)   | 137.90(14) | C(16)-N(4)-Cu(1) | 103.7(2)   |
| N(3)-Cu(1)-N(4)   | 109.94(14) | S(1)-N(4)-Cu(1)  | 120.5(2)   |
| N(1)-Cu(1)-N(2)   | 100.50(14) | Cu(2)-N(4)-Cu(1) | 82.39(13)  |
| N(3)-Cu(1)-N(2)   | 99.39(15)  | N(1)-C(1)-C(2)   | 123.1(4)   |
| N(4)-Cu(1)-N(2)   | 85.75(13)  | N(1)-C(1)-H(1)   | 118.5      |
| N(1)-Cu(1)-Cu(2)  | 92.87(10)  | C(2)-C(1)-H(1)   | 118.5      |
| N(3)-Cu(1)-Cu(2)  | 147.76(11) | C(3)-C(2)-C(1)   | 118.9(4)   |
| N(4)-Cu(1)-Cu(2)  | 45.14(9)   | C(3)-C(2)-H(2)   | 120.5      |
| N(2)-Cu(1)-Cu(2)  | 98.38(10)  | C(1)-C(2)-H(2)   | 120.5      |
| N(4)-Cu(2)-Cl(1)  | 174.12(11) | C(2)-C(3)-C(4)   | 118.8(4)   |
| N(4)-Cu(2)-Cu(1)  | 52.46(10)  | C(2)-C(3)-H(3)   | 120.6      |
| Cl(1)-Cu(2)-Cu(1) | 132.48(4)  | C(4)-C(3)-H(3)   | 120.6      |
| O(1)-S(1)-O(2)    | 117.30(19) | C(3)-C(4)-C(5)   | 120.3(5)   |
| O(1)-S(1)-N(4)    | 111.89(19) | C(3)-C(4)-H(4)   | 119.8      |
| O(2)-S(1)-N(4)    | 107.48(18) | C(5)-C(4)-H(4)   | 119.8      |
| O(1)-S(1)-C(17)   | 106.12(19) | N(1)-C(5)-C(4)   | 120.6(4)   |
| O(2)-S(1)-C(17)   | 108.90(19) | N(1)-C(5)-C(6)   | 118.0(4)   |
| N(4)-S(1)-C(17)   | 104.35(19) | C(4)-C(5)-C(6)   | 121.4(4)   |
| C(20)-O(3)-C(23)  | 118.0(4)   | C(5)-C(6)-C(7)   | 115.0(4)   |
| C(5)-N(1)-C(1)    | 118.2(4)   | C(5)-C(6)-H(6A)  | 108.5      |
| C(5)-N(1)-Cu(1)   | 119.5(3)   | C(7)-C(6)-H(6A)  | 108.5      |
| C(1)-N(1)-Cu(1)   | 120.5(3)   | C(5)-C(6)-H(6B)  | 108.5      |
| C(15)-N(2)-C(8)   | 110.4(3)   | C(7)-C(6)-H(6B)  | 108.5      |
| C(15)-N(2)-C(7)   | 109.6(3)   | H(6A)-C(6)-H(6B) | 107.5      |
| C(8)-N(2)-C(7)    | 110.8(3)   | N(2)-C(7)-C(6)   | 113.2(4)   |
| C(15)-N(2)-Cu(1)  | 103.7(2)   | N(2)-C(7)-H(7A)  | 108.9      |
| C(8)-N(2)-Cu(1)   | 110.2(3)   | C(6)-C(7)-H(7A)  | 108.9      |
| C(7)-N(2)-Cu(1)   | 111.9(3)   | N(2)-C(7)-H(7B)  | 108.9      |
| C(10)-N(3)-C(14)  | 118.2(4)   | C(6)-C(7)-H(7B)  | 108.9      |
| C(10)-N(3)-Cu(1)  | 121.7(3)   | H(7A)-C(7)-H(7B) | 107.7      |
| C(14)-N(3)-Cu(1)  | 120.0(3)   | N(2)-C(8)-C(9)   | 113.0(4)   |
| C(16)-N(4)-S(1)   | 112.3(3)   | N(2)-C(8)-H(8A)  | 109.0      |
| C(16)-N(4)-Cu(2)  | 123.1(3)   | C(9)-C(8)-H(8A)  | 109.0      |

|                     |          |                     |          |
|---------------------|----------|---------------------|----------|
| N(2)-C(8)-H(8B)     | 109.0    | N(4)-C(16)-C(15)    | 110.6(3) |
| C(9)-C(8)-H(8B)     | 109.0    | N(4)-C(16)-H(16A)   | 109.5    |
| H(8A)-C(8)-H(8B)    | 107.8    | C(15)-C(16)-H(16A)  | 109.5    |
| C(10)-C(9)-C(8)     | 115.8(4) | N(4)-C(16)-H(16B)   | 109.5    |
| C(10)-C(9)-H(9A)    | 108.3    | C(15)-C(16)-H(16B)  | 109.5    |
| C(8)-C(9)-H(9A)     | 108.3    | H(16A)-C(16)-H(16B) | 108.1    |
| C(10)-C(9)-H(9B)    | 108.3    | C(22)-C(17)-C(18)   | 120.0(4) |
| C(8)-C(9)-H(9B)     | 108.3    | C(22)-C(17)-S(1)    | 120.7(3) |
| H(9A)-C(9)-H(9B)    | 107.4    | C(18)-C(17)-S(1)    | 119.2(3) |
| N(3)-C(10)-C(11)    | 121.1(4) | C(19)-C(18)-C(17)   | 120.1(4) |
| N(3)-C(10)-C(9)     | 117.9(4) | C(19)-C(18)-H(18)   | 119.9    |
| C(11)-C(10)-C(9)    | 121.0(4) | C(17)-C(18)-H(18)   | 119.9    |
| C(12)-C(11)-C(10)   | 120.4(5) | C(18)-C(19)-C(20)   | 120.0(4) |
| C(12)-C(11)-H(11)   | 119.8    | C(18)-C(19)-H(19)   | 120.0    |
| C(10)-C(11)-H(11)   | 119.8    | C(20)-C(19)-H(19)   | 120.0    |
| C(11)-C(12)-C(13)   | 118.4(5) | O(3)-C(20)-C(19)    | 115.0(4) |
| C(11)-C(12)-H(12)   | 120.8    | O(3)-C(20)-C(21)    | 124.5(4) |
| C(13)-C(12)-H(12)   | 120.8    | C(19)-C(20)-C(21)   | 120.5(4) |
| C(14)-C(13)-C(12)   | 119.0(5) | C(20)-C(21)-C(22)   | 118.8(4) |
| C(14)-C(13)-H(13)   | 120.5    | C(20)-C(21)-H(21)   | 120.6    |
| C(12)-C(13)-H(13)   | 120.5    | C(22)-C(21)-H(21)   | 120.6    |
| N(3)-C(14)-C(13)    | 122.9(5) | C(17)-C(22)-C(21)   | 120.5(4) |
| N(3)-C(14)-H(14)    | 118.5    | C(17)-C(22)-H(22)   | 119.7    |
| C(13)-C(14)-H(14)   | 118.5    | C(21)-C(22)-H(22)   | 119.7    |
| N(2)-C(15)-C(16)    | 111.3(4) | O(3)-C(23)-H(23A)   | 109.5    |
| N(2)-C(15)-H(15A)   | 109.4    | O(3)-C(23)-H(23B)   | 109.5    |
| C(16)-C(15)-H(15A)  | 109.4    | H(23A)-C(23)-H(23B) | 109.5    |
| N(2)-C(15)-H(15B)   | 109.4    | O(3)-C(23)-H(23C)   | 109.5    |
| C(16)-C(15)-H(15B)  | 109.4    | H(23A)-C(23)-H(23C) | 109.5    |
| H(15A)-C(15)-H(15B) | 108.0    | H(23B)-C(23)-H(23C) | 109.5    |

---

**Table D.2.4.** Anisotropic displacement parameters ( $\text{\AA}^2 \times 10^3$ ) for Cu(PEMAEA)-CuCl. The anisotropic displacement factor exponent takes the form:  $-2\pi^2 [ h^2 a^{*2} U^{11} + \dots + 2 h k a^* b^* U^{12} ]$

|       | $U^{11}$ | $U^{22}$ | $U^{33}$ | $U^{23}$ | $U^{13}$ | $U^{12}$ |
|-------|----------|----------|----------|----------|----------|----------|
| Cu(1) | 16(1)    | 20(1)    | 18(1)    | 1(1)     | 1(1)     | 4(1)     |
| Cu(2) | 21(1)    | 22(1)    | 16(1)    | 2(1)     | 2(1)     | 6(1)     |
| Cl(1) | 46(1)    | 27(1)    | 17(1)    | 4(1)     | 5(1)     | 12(1)    |
| S(1)  | 17(1)    | 21(1)    | 19(1)    | -2(1)    | -3(1)    | 6(1)     |
| O(1)  | 33(2)    | 33(2)    | 22(2)    | -8(1)    | -7(1)    | 16(2)    |
| O(2)  | 17(2)    | 23(2)    | 36(2)    | 1(1)     | -3(1)    | 1(1)     |
| O(3)  | 47(2)    | 24(2)    | 32(2)    | -5(1)    | -5(2)    | 17(2)    |
| N(1)  | 22(2)    | 25(2)    | 15(2)    | -2(2)    | 0(2)     | 7(2)     |
| N(2)  | 12(2)    | 22(2)    | 27(2)    | 1(2)     | 3(2)     | 4(2)     |
| N(3)  | 30(2)    | 24(2)    | 19(2)    | 0(2)     | 4(2)     | 12(2)    |
| N(4)  | 18(2)    | 22(2)    | 19(2)    | 2(2)     | -1(2)    | 8(2)     |
| C(1)  | 25(2)    | 26(3)    | 19(2)    | -4(2)    | 7(2)     | 4(2)     |
| C(2)  | 37(3)    | 23(2)    | 28(3)    | 2(2)     | 9(2)     | 10(2)    |
| C(3)  | 45(3)    | 33(3)    | 26(3)    | 6(2)     | 4(2)     | 23(2)    |
| C(4)  | 29(3)    | 39(3)    | 23(3)    | 3(2)     | 0(2)     | 13(2)    |
| C(5)  | 19(2)    | 29(2)    | 16(2)    | 2(2)     | 2(2)     | 9(2)     |
| C(6)  | 23(2)    | 26(2)    | 28(3)    | -3(2)    | -9(2)    | 8(2)     |
| C(7)  | 14(2)    | 26(2)    | 38(3)    | 1(2)     | -1(2)    | 6(2)     |
| C(8)  | 18(2)    | 25(2)    | 26(3)    | 6(2)     | 9(2)     | 2(2)     |
| C(9)  | 29(3)    | 33(3)    | 30(3)    | 1(2)     | 11(2)    | 13(2)    |
| C(10) | 33(3)    | 23(2)    | 23(3)    | 2(2)     | 8(2)     | 16(2)    |
| C(11) | 51(3)    | 26(3)    | 25(3)    | 5(2)     | 15(2)    | 16(2)    |
| C(12) | 69(4)    | 31(3)    | 23(3)    | -3(2)    | -2(3)    | 22(3)    |
| C(13) | 44(3)    | 33(3)    | 36(3)    | -6(2)    | -12(2)   | 21(2)    |
| C(14) | 25(2)    | 26(2)    | 29(3)    | -10(2)   | -5(2)    | 6(2)     |
| C(15) | 19(2)    | 17(2)    | 23(2)    | 3(2)     | 3(2)     | 2(2)     |
| C(16) | 24(2)    | 20(2)    | 22(2)    | 3(2)     | 5(2)     | 10(2)    |
| C(17) | 11(2)    | 21(2)    | 21(2)    | -3(2)    | 0(2)     | 1(2)     |
| C(18) | 16(2)    | 22(2)    | 23(2)    | -1(2)    | -2(2)    | 1(2)     |
| C(19) | 19(2)    | 24(2)    | 23(2)    | 5(2)     | -6(2)    | 3(2)     |
| C(20) | 13(2)    | 18(2)    | 35(3)    | 2(2)     | 0(2)     | 1(2)     |
| C(21) | 15(2)    | 26(2)    | 24(2)    | -2(2)    | 3(2)     | 3(2)     |



|       |       |       |       |       |       |      |
|-------|-------|-------|-------|-------|-------|------|
| C(22) | 14(2) | 23(2) | 22(2) | 5(2)  | 2(2)  | 6(2) |
| C(23) | 35(3) | 24(3) | 38(3) | -2(2) | 10(2) | 9(2) |

---

**Table D.2.5.** Hydrogen coordinates ( $\times 10^4$ ) and isotropic displacement parameters ( $\text{\AA}^2 \times 10^{-3}$ ) for Cu(PEMAEA)-CuCl.

|        | x    | y     | z     | U(eq) |
|--------|------|-------|-------|-------|
| H(1)   | 3128 | -543  | 2708  | 29    |
| H(2)   | 4190 | -2023 | 3505  | 35    |
| H(3)   | 6487 | -1070 | 4337  | 38    |
| H(4)   | 7601 | 1372  | 4409  | 36    |
| H(6A)  | 7450 | 3660  | 4199  | 31    |
| H(6B)  | 5863 | 3816  | 3954  | 31    |
| H(7A)  | 7833 | 5026  | 2885  | 31    |
| H(7B)  | 7692 | 3502  | 2396  | 31    |
| H(8A)  | 7386 | 4807  | 975   | 29    |
| H(8B)  | 5720 | 4588  | 601   | 29    |
| H(9A)  | 6929 | 2841  | 6     | 36    |
| H(9B)  | 6588 | 2197  | 1070  | 36    |
| H(11)  | 5286 | 1528  | -1250 | 39    |
| H(12)  | 2944 | 141   | -1834 | 48    |
| H(13)  | 1042 | -410  | -717  | 43    |
| H(14)  | 1515 | 515   | 899   | 33    |
| H(15A) | 6238 | 6263  | 2049  | 25    |
| H(15B) | 5576 | 5572  | 3053  | 25    |
| H(16A) | 3737 | 6166  | 2120  | 25    |
| H(16B) | 3940 | 5216  | 1184  | 25    |
| H(18)  | 473  | 5775  | 658   | 26    |
| H(19)  | -53  | 7859  | 1005  | 27    |
| H(21)  | 593  | 7462  | 3963  | 27    |
| H(22)  | 1056 | 5321  | 3597  | 23    |
| H(23A) | -40  | 10697 | 3584  | 48    |
| H(23B) | 1149 | 9936  | 3883  | 48    |
| H(23C) | -561 | 9174  | 4038  | 48    |

**Table D.3.1.** Crystal data and structure refinement for Cu(PENAEA)-CuCl.

|                                       |                                                                                    |                              |
|---------------------------------------|------------------------------------------------------------------------------------|------------------------------|
| Identification code                   | mn1643                                                                             |                              |
| Empirical formula                     | C <sub>22</sub> H <sub>24</sub> Cl Cu <sub>2</sub> N <sub>5</sub> O <sub>4</sub> S |                              |
| Formula weight                        | 617.05                                                                             |                              |
| Temperature                           | 90(2) K                                                                            |                              |
| Wavelength                            | 0.71073 Å                                                                          |                              |
| Crystal system                        | Triclinic                                                                          |                              |
| Space group                           | $\bar{P}1$                                                                         |                              |
| Unit cell dimensions                  | a = 8.9933(9) Å                                                                    | $\alpha = 94.085(3)^\circ$ . |
|                                       | b = 10.8437(11) Å                                                                  | $\beta = 98.630(4)^\circ$ .  |
|                                       | c = 26.491(3) Å                                                                    | $\gamma = 92.039(3)^\circ$ . |
| Volume                                | 2544.9(4) Å <sup>3</sup>                                                           |                              |
| Z                                     | 4                                                                                  |                              |
| Density (calculated)                  | 1.611 Mg/m <sup>3</sup>                                                            |                              |
| Absorption coefficient                | 1.897 mm <sup>-1</sup>                                                             |                              |
| F(000)                                | 1256                                                                               |                              |
| Crystal size                          | 0.64 x 0.13 x 0.06 mm <sup>3</sup>                                                 |                              |
| Crystal color and habit               | red-brown needle                                                                   |                              |
| Diffractometer                        | Bruker SMART 1000                                                                  |                              |
| $\Theta$ range for data collection    | 1.56 to 27.48°.                                                                    |                              |
| Index ranges                          | -11 ≤ h ≤ 11, -14 ≤ k ≤ 14, -34 ≤ l ≤ 34                                           |                              |
| Reflections collected                 | 28321                                                                              |                              |
| Independent reflections               | 11643 [R(int) = 0.0251]                                                            |                              |
| Observed reflections (I > 2σ(I))      | 9820                                                                               |                              |
| Completeness to $\Theta = 27.5^\circ$ | 99.7 %                                                                             |                              |
| Absorption correction                 | Semi-empirical from equivalents                                                    |                              |
| Max. and min. transmission            | 0.895 and 0.377                                                                    |                              |
| Solution method                       | SHELXS97 (Sheldrick, 1990)                                                         |                              |
| Refinement method                     | SHELXL97 (Sheldrick, 1997) Full-matrix least-squares on F <sup>2</sup>             |                              |
| Data / restraints / parameters        | 11643 / 0 / 631                                                                    |                              |
| Goodness-of-fit on F <sup>2</sup>     | 1.002                                                                              |                              |
| Final R indices [I > 2σ(I)]           | R1 = 0.0270, wR2 = 0.0657                                                          |                              |
| R indices (all data)                  | R1 = 0.0366, wR2 = 0.0707                                                          |                              |
| Largest diff. peak and hole           | 0.510 and -0.339 e.Å <sup>-3</sup>                                                 |                              |

**Table D.3.2.** Atomic coordinates ( $\times 10^4$ ) and equivalent isotropic displacement parameters ( $\text{\AA}^2 \times 10^3$ ) for Cu(PENAEA)-CuCl.  $U(\text{eq})$  is defined as one third of the trace of the orthogonalized  $U^{ij}$  tensor.

|       | x        | y       | z       | U(eq) |
|-------|----------|---------|---------|-------|
| Cu(1) | 2220(1)  | 5810(1) | 1000(1) | 14(1) |
| Cu(2) | -106(1)  | 6091(1) | 1512(1) | 14(1) |
| Cl(1) | -1401(1) | 7656(1) | 1588(1) | 23(1) |
| S(1)  | 222(1)   | 3470(1) | 1152(1) | 14(1) |
| O(1)  | 1263(2)  | 2560(1) | 1024(1) | 21(1) |
| O(2)  | -802(2)  | 3918(1) | 739(1)  | 18(1) |
| O(3)  | -4023(2) | -134(1) | 2367(1) | 27(1) |
| O(4)  | -5359(2) | 1488(2) | 2276(1) | 27(1) |
| N(1)  | 2021(2)  | 7540(2) | 814(1)  | 14(1) |
| N(2)  | 3894(2)  | 6029(2) | 1672(1) | 14(1) |
| N(3)  | 3190(2)  | 4662(2) | 521(1)  | 15(1) |
| N(4)  | 1052(2)  | 4663(2) | 1484(1) | 13(1) |
| N(5)  | -4213(2) | 925(2)  | 2242(1) | 21(1) |
| C(1)  | 1562(2)  | 7778(2) | 323(1)  | 19(1) |
| C(2)  | 1568(3)  | 8961(2) | 158(1)  | 24(1) |
| C(3)  | 2066(3)  | 9947(2) | 511(1)  | 25(1) |
| C(4)  | 2555(3)  | 9713(2) | 1015(1) | 21(1) |
| C(5)  | 2523(2)  | 8503(2) | 1159(1) | 15(1) |
| C(6)  | 3026(2)  | 8223(2) | 1706(1) | 16(1) |
| C(7)  | 4347(2)  | 7360(2) | 1787(1) | 16(1) |
| C(8)  | 5213(2)  | 5306(2) | 1585(1) | 17(1) |
| C(9)  | 5601(2)  | 5360(2) | 1042(1) | 18(1) |
| C(10) | 4678(2)  | 4478(2) | 640(1)  | 17(1) |
| C(11) | 5350(3)  | 3520(2) | 392(1)  | 21(1) |
| C(12) | 4486(3)  | 2756(2) | 7(1)    | 23(1) |
| C(13) | 2976(3)  | 2976(2) | -129(1) | 21(1) |
| C(14) | 2376(2)  | 3926(2) | 138(1)  | 18(1) |
| C(15) | 3198(2)  | 5544(2) | 2095(1) | 15(1) |
| C(16) | 2213(2)  | 4381(2) | 1915(1) | 16(1) |
| C(17) | -947(2)  | 2721(2) | 1541(1) | 15(1) |
| C(18) | -1026(3) | 1431(2) | 1523(1) | 21(1) |
| C(19) | -2073(3) | 833(2)  | 1769(1) | 22(1) |

|       |          |          |         |       |
|-------|----------|----------|---------|-------|
| C(20) | -3003(2) | 1549(2)  | 2025(1) | 17(1) |
| C(21) | -2901(2) | 2826(2)  | 2069(1) | 19(1) |
| C(22) | -1855(2) | 3414(2)  | 1818(1) | 18(1) |
| Cu(3) | 2900(1)  | 10499(1) | 3975(1) | 13(1) |
| Cu(4) | 5305(1)  | 10616(1) | 3515(1) | 13(1) |
| Cl(2) | 6752(1)  | 12156(1) | 3456(1) | 20(1) |
| S(2)  | 4730(1)  | 8119(1)  | 3863(1) | 13(1) |
| O(5)  | 3599(2)  | 7233(1)  | 3964(1) | 19(1) |
| O(6)  | 5724(2)  | 8726(1)  | 4297(1) | 18(1) |
| O(7)  | 10240(2) | 5994(2)  | 2702(1) | 31(1) |
| O(8)  | 9465(2)  | 4263(2)  | 2959(1) | 30(1) |
| N(6)  | 3159(2)  | 12297(2) | 4160(1) | 14(1) |
| N(7)  | 1277(2)  | 10434(2) | 3289(1) | 13(1) |
| N(8)  | 1825(2)  | 9533(2)  | 4449(1) | 15(1) |
| N(9)  | 4033(2)  | 9178(2)  | 3522(1) | 12(1) |
| N(10) | 9353(2)  | 5371(2)  | 2900(1) | 21(1) |
| C(23) | 3505(2)  | 12728(2) | 4658(1) | 19(1) |
| C(24) | 3403(3)  | 13949(2) | 4825(1) | 23(1) |
| C(25) | 2932(3)  | 14788(2) | 4468(1) | 23(1) |
| C(26) | 2571(2)  | 14360(2) | 3957(1) | 20(1) |
| C(27) | 2692(2)  | 13114(2) | 3811(1) | 15(1) |
| C(28) | 2297(2)  | 12617(2) | 3258(1) | 15(1) |
| C(29) | 916(2)   | 11705(2) | 3152(1) | 16(1) |
| C(30) | -101(2)  | 9735(2)  | 3371(1) | 15(1) |
| C(31) | -518(2)  | 10009(2) | 3906(1) | 17(1) |
| C(32) | 318(2)   | 9303(2)  | 4323(1) | 15(1) |
| C(33) | -450(2)  | 8466(2)  | 4581(1) | 21(1) |
| C(34) | 338(3)   | 7874(2)  | 4978(1) | 23(1) |
| C(35) | 1872(2)  | 8143(2)  | 5116(1) | 18(1) |
| C(36) | 2561(2)  | 8964(2)  | 4841(1) | 17(1) |
| C(37) | 1976(2)  | 9782(2)  | 2879(1) | 15(1) |
| C(38) | 2880(2)  | 8713(2)  | 3081(1) | 15(1) |
| C(39) | 5933(2)  | 7250(2)  | 3507(1) | 14(1) |
| C(40) | 6184(2)  | 6030(2)  | 3621(1) | 18(1) |
| C(41) | 7286(3)  | 5394(2)  | 3412(1) | 21(1) |
| C(42) | 8086(2)  | 5996(2)  | 3087(1) | 17(1) |

|       |         |         |         |       |
|-------|---------|---------|---------|-------|
| C(43) | 7780(2) | 7168(2) | 2937(1) | 16(1) |
| C(44) | 6694(2) | 7803(2) | 3156(1) | 14(1) |

---

**Table D.3.3.** Bond lengths [Å] and angles [°] for Cu(PENAEA)-CuCl.

|             |            |              |            |
|-------------|------------|--------------|------------|
| Cu(1)-N(1)  | 1.9797(17) | C(7)-H(7A)   | 0.9900     |
| Cu(1)-N(3)  | 2.0264(17) | C(7)-H(7B)   | 0.9900     |
| Cu(1)-N(2)  | 2.1456(16) | C(8)-C(9)    | 1.533(3)   |
| Cu(1)-N(4)  | 2.1980(16) | C(8)-H(8A)   | 0.9900     |
| Cu(1)-Cu(2) | 2.6730(4)  | C(8)-H(8B)   | 0.9900     |
| Cu(2)-N(4)  | 1.8988(17) | C(9)-C(10)   | 1.508(3)   |
| Cu(2)-Cl(1) | 2.1068(6)  | C(9)-H(9A)   | 0.9900     |
| S(1)-O(1)   | 1.4417(15) | C(9)-H(9B)   | 0.9900     |
| S(1)-O(2)   | 1.4456(15) | C(10)-C(11)  | 1.393(3)   |
| S(1)-N(4)   | 1.6039(17) | C(11)-C(12)  | 1.386(3)   |
| S(1)-C(17)  | 1.791(2)   | C(11)-H(11A) | 0.9500     |
| O(3)-N(5)   | 1.228(2)   | C(12)-C(13)  | 1.386(3)   |
| O(4)-N(5)   | 1.228(2)   | C(12)-H(12A) | 0.9500     |
| N(1)-C(1)   | 1.351(3)   | C(13)-C(14)  | 1.379(3)   |
| N(1)-C(5)   | 1.354(3)   | C(13)-H(13A) | 0.9500     |
| N(2)-C(15)  | 1.482(2)   | C(14)-H(14A) | 0.9500     |
| N(2)-C(8)   | 1.482(3)   | C(15)-C(16)  | 1.520(3)   |
| N(2)-C(7)   | 1.483(3)   | C(15)-H(15A) | 0.9900     |
| N(3)-C(14)  | 1.350(3)   | C(15)-H(15B) | 0.9900     |
| N(3)-C(10)  | 1.354(3)   | C(16)-H(16A) | 0.9900     |
| N(4)-C(16)  | 1.485(2)   | C(16)-H(16B) | 0.9900     |
| N(5)-C(20)  | 1.471(3)   | C(17)-C(22)  | 1.385(3)   |
| C(1)-C(2)   | 1.384(3)   | C(17)-C(18)  | 1.394(3)   |
| C(1)-H(1B)  | 0.9500     | C(18)-C(19)  | 1.390(3)   |
| C(2)-C(3)   | 1.385(3)   | C(18)-H(18A) | 0.9500     |
| C(2)-H(2B)  | 0.9500     | C(19)-C(20)  | 1.380(3)   |
| C(3)-C(4)   | 1.384(3)   | C(19)-H(19A) | 0.9500     |
| C(3)-H(3A)  | 0.9500     | C(20)-C(21)  | 1.380(3)   |
| C(4)-C(5)   | 1.392(3)   | C(21)-C(22)  | 1.391(3)   |
| C(4)-H(4A)  | 0.9500     | C(21)-H(21A) | 0.9500     |
| C(5)-C(6)   | 1.509(3)   | C(22)-H(22A) | 0.9500     |
| C(6)-C(7)   | 1.537(3)   | Cu(3)-N(6)   | 1.9730(17) |
| C(6)-H(6A)  | 0.9900     | Cu(3)-N(8)   | 2.0223(16) |
| C(6)-H(6B)  | 0.9900     | Cu(3)-N(7)   | 2.1485(16) |

|                 |            |                 |           |
|-----------------|------------|-----------------|-----------|
| Cu(3)-N(9)      | 2.1800(16) | C(29)-H(29A)    | 0.9900    |
| Cu(3)-Cu(4)     | 2.6395(4)  | C(29)-H(29B)    | 0.9900    |
| Cu(4)-N(9)      | 1.9030(16) | C(30)-C(31)     | 1.532(3)  |
| Cu(4)-Cl(2)     | 2.1100(6)  | C(30)-H(30A)    | 0.9900    |
| S(2)-O(5)       | 1.4418(15) | C(30)-H(30B)    | 0.9900    |
| S(2)-O(6)       | 1.4488(15) | C(31)-C(32)     | 1.512(3)  |
| S(2)-N(9)       | 1.5998(16) | C(31)-H(31A)    | 0.9900    |
| S(2)-C(39)      | 1.788(2)   | C(31)-H(31B)    | 0.9900    |
| O(7)-N(10)      | 1.227(2)   | C(32)-C(33)     | 1.397(3)  |
| O(8)-N(10)      | 1.227(2)   | C(33)-C(34)     | 1.388(3)  |
| N(6)-C(23)      | 1.354(3)   | C(33)-H(33A)    | 0.9500    |
| N(6)-C(27)      | 1.358(2)   | C(34)-C(35)     | 1.389(3)  |
| N(7)-C(30)      | 1.482(2)   | C(34)-H(34A)    | 0.9500    |
| N(7)-C(37)      | 1.484(2)   | C(35)-C(36)     | 1.377(3)  |
| N(7)-C(29)      | 1.485(2)   | C(35)-H(35A)    | 0.9500    |
| N(8)-C(36)      | 1.346(3)   | C(36)-H(36A)    | 0.9500    |
| N(8)-C(32)      | 1.356(3)   | C(37)-C(38)     | 1.522(3)  |
| N(9)-C(38)      | 1.486(2)   | C(37)-H(37A)    | 0.9900    |
| N(10)-C(42)     | 1.476(3)   | C(37)-H(37B)    | 0.9900    |
| C(23)-C(24)     | 1.376(3)   | C(38)-H(38A)    | 0.9900    |
| C(23)-H(23A)    | 0.9500     | C(38)-H(38B)    | 0.9900    |
| C(24)-C(25)     | 1.390(3)   | C(39)-C(44)     | 1.391(3)  |
| C(24)-H(24A)    | 0.9500     | C(39)-C(40)     | 1.396(3)  |
| C(25)-C(26)     | 1.386(3)   | C(40)-C(41)     | 1.386(3)  |
| C(25)-H(25A)    | 0.9500     | C(40)-H(40A)    | 0.9500    |
| C(26)-C(27)     | 1.391(3)   | C(41)-C(42)     | 1.385(3)  |
| C(26)-H(26A)    | 0.9500     | C(41)-H(41A)    | 0.9500    |
| C(27)-C(28)     | 1.509(3)   | C(42)-C(43)     | 1.383(3)  |
| C(28)-C(29)     | 1.539(3)   | C(43)-C(44)     | 1.389(3)  |
| C(28)-H(28A)    | 0.9900     | C(43)-H(43A)    | 0.9500    |
| C(28)-H(28B)    | 0.9900     | C(44)-H(44A)    | 0.9500    |
|                 |            |                 |           |
| N(1)-Cu(1)-N(3) | 116.30(7)  | N(1)-Cu(1)-N(4) | 133.03(6) |
| N(1)-Cu(1)-N(2) | 101.77(7)  | N(3)-Cu(1)-N(4) | 107.91(6) |
| N(3)-Cu(1)-N(2) | 102.61(7)  | N(2)-Cu(1)-N(4) | 82.60(6)  |



|                   |             |                  |            |
|-------------------|-------------|------------------|------------|
| N(1)-Cu(1)-Cu(2)  | 88.58(5)    | C(2)-C(1)-H(1B)  | 118.5      |
| N(3)-Cu(1)-Cu(2)  | 145.34(5)   | C(1)-C(2)-C(3)   | 118.7(2)   |
| N(2)-Cu(1)-Cu(2)  | 94.70(4)    | C(1)-C(2)-H(2B)  | 120.7      |
| N(4)-Cu(1)-Cu(2)  | 44.57(4)    | C(3)-C(2)-H(2B)  | 120.7      |
| N(4)-Cu(2)-Cl(1)  | 176.67(5)   | C(4)-C(3)-C(2)   | 118.8(2)   |
| N(4)-Cu(2)-Cu(1)  | 54.33(5)    | C(4)-C(3)-H(3A)  | 120.6      |
| Cl(1)-Cu(2)-Cu(1) | 128.351(19) | C(2)-C(3)-H(3A)  | 120.6      |
| O(1)-S(1)-O(2)    | 117.88(9)   | C(3)-C(4)-C(5)   | 119.9(2)   |
| O(1)-S(1)-N(4)    | 112.53(9)   | C(3)-C(4)-H(4A)  | 120.0      |
| O(2)-S(1)-N(4)    | 106.98(9)   | C(5)-C(4)-H(4A)  | 120.0      |
| O(1)-S(1)-C(17)   | 105.42(9)   | N(1)-C(5)-C(4)   | 121.29(18) |
| O(2)-S(1)-C(17)   | 105.47(9)   | N(1)-C(5)-C(6)   | 117.67(17) |
| N(4)-S(1)-C(17)   | 107.95(9)   | C(4)-C(5)-C(6)   | 121.04(18) |
| C(1)-N(1)-C(5)    | 118.27(17)  | C(5)-C(6)-C(7)   | 115.22(16) |
| C(1)-N(1)-Cu(1)   | 120.18(14)  | C(5)-C(6)-H(6A)  | 108.5      |
| C(5)-N(1)-Cu(1)   | 120.99(13)  | C(7)-C(6)-H(6A)  | 108.5      |
| C(15)-N(2)-C(8)   | 109.99(15)  | C(5)-C(6)-H(6B)  | 108.5      |
| C(15)-N(2)-C(7)   | 110.70(15)  | C(7)-C(6)-H(6B)  | 108.5      |
| C(8)-N(2)-C(7)    | 110.47(15)  | H(6A)-C(6)-H(6B) | 107.5      |
| C(15)-N(2)-Cu(1)  | 106.85(12)  | N(2)-C(7)-C(6)   | 113.75(16) |
| C(8)-N(2)-Cu(1)   | 109.45(11)  | N(2)-C(7)-H(7A)  | 108.8      |
| C(7)-N(2)-Cu(1)   | 109.31(12)  | C(6)-C(7)-H(7A)  | 108.8      |
| C(14)-N(3)-C(10)  | 118.27(18)  | N(2)-C(7)-H(7B)  | 108.8      |
| C(14)-N(3)-Cu(1)  | 122.40(14)  | C(6)-C(7)-H(7B)  | 108.8      |
| C(10)-N(3)-Cu(1)  | 118.41(13)  | H(7A)-C(7)-H(7B) | 107.7      |
| C(16)-N(4)-S(1)   | 114.64(13)  | N(2)-C(8)-C(9)   | 113.20(16) |
| C(16)-N(4)-Cu(2)  | 122.20(13)  | N(2)-C(8)-H(8A)  | 108.9      |
| S(1)-N(4)-Cu(2)   | 115.74(9)   | C(9)-C(8)-H(8A)  | 108.9      |
| C(16)-N(4)-Cu(1)  | 105.88(12)  | N(2)-C(8)-H(8B)  | 108.9      |
| S(1)-N(4)-Cu(1)   | 110.45(8)   | C(9)-C(8)-H(8B)  | 108.9      |
| Cu(2)-N(4)-Cu(1)  | 81.10(6)    | H(8A)-C(8)-H(8B) | 107.8      |
| O(3)-N(5)-O(4)    | 124.41(18)  | C(10)-C(9)-C(8)  | 115.19(17) |
| O(3)-N(5)-C(20)   | 117.83(18)  | C(10)-C(9)-H(9A) | 108.5      |
| O(4)-N(5)-C(20)   | 117.74(17)  | C(8)-C(9)-H(9A)  | 108.5      |
| N(1)-C(1)-C(2)    | 123.00(19)  | C(10)-C(9)-H(9B) | 108.5      |
| N(1)-C(1)-H(1B)   | 118.5       | C(8)-C(9)-H(9B)  | 108.5      |

|                     |            |                    |             |
|---------------------|------------|--------------------|-------------|
| H(9A)-C(9)-H(9B)    | 107.5      | C(18)-C(19)-H(19A) | 121.0       |
| N(3)-C(10)-C(11)    | 121.31(19) | C(19)-C(20)-C(21)  | 123.42(19)  |
| N(3)-C(10)-C(9)     | 117.95(18) | C(19)-C(20)-N(5)   | 118.44(18)  |
| C(11)-C(10)-C(9)    | 120.73(19) | C(21)-C(20)-N(5)   | 118.08(19)  |
| C(12)-C(11)-C(10)   | 119.5(2)   | C(20)-C(21)-C(22)  | 117.86(19)  |
| C(12)-C(11)-H(11A)  | 120.3      | C(20)-C(21)-H(21A) | 121.1       |
| C(10)-C(11)-H(11A)  | 120.3      | C(22)-C(21)-H(21A) | 121.1       |
| C(13)-C(12)-C(11)   | 119.2(2)   | C(17)-C(22)-C(21)  | 120.06(19)  |
| C(13)-C(12)-H(12A)  | 120.4      | C(17)-C(22)-H(22A) | 120.0       |
| C(11)-C(12)-H(12A)  | 120.4      | C(21)-C(22)-H(22A) | 120.0       |
| C(14)-C(13)-C(12)   | 118.3(2)   | N(6)-Cu(3)-N(8)    | 114.99(7)   |
| C(14)-C(13)-H(13A)  | 120.8      | N(6)-Cu(3)-N(7)    | 101.45(6)   |
| C(12)-C(13)-H(13A)  | 120.8      | N(8)-Cu(3)-N(7)    | 102.90(7)   |
| N(3)-C(14)-C(13)    | 123.3(2)   | N(6)-Cu(3)-N(9)    | 134.58(7)   |
| N(3)-C(14)-H(14A)   | 118.3      | N(8)-Cu(3)-N(9)    | 107.56(6)   |
| C(13)-C(14)-H(14A)  | 118.3      | N(7)-Cu(3)-N(9)    | 83.32(6)    |
| N(2)-C(15)-C(16)    | 111.55(15) | N(6)-Cu(3)-Cu(4)   | 89.46(5)    |
| N(2)-C(15)-H(15A)   | 109.3      | N(8)-Cu(3)-Cu(4)   | 144.65(5)   |
| C(16)-C(15)-H(15A)  | 109.3      | N(7)-Cu(3)-Cu(4)   | 96.19(4)    |
| N(2)-C(15)-H(15B)   | 109.3      | N(9)-Cu(3)-Cu(4)   | 45.28(4)    |
| C(16)-C(15)-H(15B)  | 109.3      | N(9)-Cu(4)-Cl(2)   | 175.86(5)   |
| H(15A)-C(15)-H(15B) | 108.0      | N(9)-Cu(4)-Cu(3)   | 54.48(5)    |
| N(4)-C(16)-C(15)    | 108.76(15) | Cl(2)-Cu(4)-Cu(3)  | 129.130(19) |
| N(4)-C(16)-H(16A)   | 109.9      | O(5)-S(2)-O(6)     | 117.75(9)   |
| C(15)-C(16)-H(16A)  | 109.9      | O(5)-S(2)-N(9)     | 112.53(9)   |
| N(4)-C(16)-H(16B)   | 109.9      | O(6)-S(2)-N(9)     | 107.28(8)   |
| C(15)-C(16)-H(16B)  | 109.9      | O(5)-S(2)-C(39)    | 105.26(9)   |
| H(16A)-C(16)-H(16B) | 108.3      | O(6)-S(2)-C(39)    | 105.08(9)   |
| C(22)-C(17)-C(18)   | 120.78(18) | N(9)-S(2)-C(39)    | 108.35(9)   |
| C(22)-C(17)-S(1)    | 119.92(15) | C(23)-N(6)-C(27)   | 118.06(18)  |
| C(18)-C(17)-S(1)    | 119.07(15) | C(23)-N(6)-Cu(3)   | 120.06(13)  |
| C(19)-C(18)-C(17)   | 119.7(2)   | C(27)-N(6)-Cu(3)   | 120.44(13)  |
| C(19)-C(18)-H(18A)  | 120.2      | C(30)-N(7)-C(37)   | 110.36(15)  |
| C(17)-C(18)-H(18A)  | 120.2      | C(30)-N(7)-C(29)   | 110.47(15)  |
| C(20)-C(19)-C(18)   | 118.09(19) | C(37)-N(7)-C(29)   | 109.98(15)  |
| C(20)-C(19)-H(19A)  | 121.0      | C(30)-N(7)-Cu(3)   | 108.98(11)  |

|                     |            |                     |            |
|---------------------|------------|---------------------|------------|
| C(37)-N(7)-Cu(3)    | 106.50(12) | N(7)-C(29)-H(29A)   | 109.0      |
| C(29)-N(7)-Cu(3)    | 110.48(12) | C(28)-C(29)-H(29A)  | 109.0      |
| C(36)-N(8)-C(32)    | 118.25(17) | N(7)-C(29)-H(29B)   | 109.0      |
| C(36)-N(8)-Cu(3)    | 122.78(14) | C(28)-C(29)-H(29B)  | 109.0      |
| C(32)-N(8)-Cu(3)    | 118.31(13) | H(29A)-C(29)-H(29B) | 107.8      |
| C(38)-N(9)-S(2)     | 114.06(13) | N(7)-C(30)-C(31)    | 113.37(16) |
| C(38)-N(9)-Cu(4)    | 123.18(12) | N(7)-C(30)-H(30A)   | 108.9      |
| S(2)-N(9)-Cu(4)     | 115.94(9)  | C(31)-C(30)-H(30A)  | 108.9      |
| C(38)-N(9)-Cu(3)    | 105.46(11) | N(7)-C(30)-H(30B)   | 108.9      |
| S(2)-N(9)-Cu(3)     | 110.87(8)  | C(31)-C(30)-H(30B)  | 108.9      |
| Cu(4)-N(9)-Cu(3)    | 80.24(6)   | H(30A)-C(30)-H(30B) | 107.7      |
| O(7)-N(10)-O(8)     | 124.10(19) | C(32)-C(31)-C(30)   | 115.37(17) |
| O(7)-N(10)-C(42)    | 117.94(18) | C(32)-C(31)-H(31A)  | 108.4      |
| O(8)-N(10)-C(42)    | 117.95(18) | C(30)-C(31)-H(31A)  | 108.4      |
| N(6)-C(23)-C(24)    | 123.16(19) | C(32)-C(31)-H(31B)  | 108.4      |
| N(6)-C(23)-H(23A)   | 118.4      | C(30)-C(31)-H(31B)  | 108.4      |
| C(24)-C(23)-H(23A)  | 118.4      | H(31A)-C(31)-H(31B) | 107.5      |
| C(23)-C(24)-C(25)   | 118.9(2)   | N(8)-C(32)-C(33)    | 121.19(18) |
| C(23)-C(24)-H(24A)  | 120.5      | N(8)-C(32)-C(31)    | 118.01(17) |
| C(25)-C(24)-H(24A)  | 120.5      | C(33)-C(32)-C(31)   | 120.77(19) |
| C(26)-C(25)-C(24)   | 118.6(2)   | C(34)-C(33)-C(32)   | 119.5(2)   |
| C(26)-C(25)-H(25A)  | 120.7      | C(34)-C(33)-H(33A)  | 120.2      |
| C(24)-C(25)-H(25A)  | 120.7      | C(32)-C(33)-H(33A)  | 120.2      |
| C(25)-C(26)-C(27)   | 119.97(19) | C(33)-C(34)-C(35)   | 119.09(19) |
| C(25)-C(26)-H(26A)  | 120.0      | C(33)-C(34)-H(34A)  | 120.5      |
| C(27)-C(26)-H(26A)  | 120.0      | C(35)-C(34)-H(34A)  | 120.5      |
| N(6)-C(27)-C(26)    | 121.32(18) | C(36)-C(35)-C(34)   | 118.29(19) |
| N(6)-C(27)-C(28)    | 117.45(18) | C(36)-C(35)-H(35A)  | 120.9      |
| C(26)-C(27)-C(28)   | 121.23(17) | C(34)-C(35)-H(35A)  | 120.9      |
| C(27)-C(28)-C(29)   | 114.12(16) | N(8)-C(36)-C(35)    | 123.63(19) |
| C(27)-C(28)-H(28A)  | 108.7      | N(8)-C(36)-H(36A)   | 118.2      |
| C(29)-C(28)-H(28A)  | 108.7      | C(35)-C(36)-H(36A)  | 118.2      |
| C(27)-C(28)-H(28B)  | 108.7      | N(7)-C(37)-C(38)    | 111.18(15) |
| C(29)-C(28)-H(28B)  | 108.7      | N(7)-C(37)-H(37A)   | 109.4      |
| H(28A)-C(28)-H(28B) | 107.6      | C(38)-C(37)-H(37A)  | 109.4      |
| N(7)-C(29)-C(28)    | 112.85(16) | N(7)-C(37)-H(37B)   | 109.4      |

|                     |            |                    |            |
|---------------------|------------|--------------------|------------|
| C(38)-C(37)-H(37B)  | 109.4      | C(39)-C(40)-H(40A) | 120.1      |
| H(37A)-C(37)-H(37B) | 108.0      | C(42)-C(41)-C(40)  | 118.14(19) |
| N(9)-C(38)-C(37)    | 109.69(16) | C(42)-C(41)-H(41A) | 120.9      |
| N(9)-C(38)-H(38A)   | 109.7      | C(40)-C(41)-H(41A) | 120.9      |
| C(37)-C(38)-H(38A)  | 109.7      | C(43)-C(42)-C(41)  | 123.27(19) |
| N(9)-C(38)-H(38B)   | 109.7      | C(43)-C(42)-N(10)  | 118.16(18) |
| C(37)-C(38)-H(38B)  | 109.7      | C(41)-C(42)-N(10)  | 118.55(18) |
| H(38A)-C(38)-H(38B) | 108.2      | C(42)-C(43)-C(44)  | 117.85(18) |
| C(44)-C(39)-C(40)   | 120.71(18) | C(42)-C(43)-H(43A) | 121.1      |
| C(44)-C(39)-S(2)    | 120.86(15) | C(44)-C(43)-H(43A) | 121.1      |
| C(40)-C(39)-S(2)    | 118.23(15) | C(43)-C(44)-C(39)  | 120.02(18) |
| C(41)-C(40)-C(39)   | 119.70(19) | C(43)-C(44)-H(44A) | 120.0      |
| C(41)-C(40)-H(40A)  | 120.1      | C(39)-C(44)-H(44A) | 120.0      |

---

**Table D.3.4.** Anisotropic displacement parameters ( $\text{\AA}^2 \times 10^3$ ) for Cu(PENAEA)-CuCl. The anisotropic displacement factor exponent takes the form:  $-2\pi^2 [ h^2 a^{*2} U^{11} + \dots + 2 h k a^* b^* U^{12} ]$

|       | $U^{11}$ | $U^{22}$ | $U^{33}$ | $U^{23}$ | $U^{13}$ | $U^{12}$ |
|-------|----------|----------|----------|----------|----------|----------|
| Cu(1) | 14(1)    | 14(1)    | 14(1)    | 0(1)     | 1(1)     | -1(1)    |
| Cu(2) | 13(1)    | 12(1)    | 17(1)    | 0(1)     | 3(1)     | 1(1)     |
| Cl(1) | 21(1)    | 17(1)    | 30(1)    | -2(1)    | 4(1)     | 6(1)     |
| S(1)  | 16(1)    | 12(1)    | 15(1)    | -1(1)    | 6(1)     | -1(1)    |
| O(1)  | 22(1)    | 15(1)    | 29(1)    | -2(1)    | 13(1)    | 1(1)     |
| O(2)  | 21(1)    | 19(1)    | 15(1)    | -1(1)    | 2(1)     | -3(1)    |
| O(3)  | 38(1)    | 19(1)    | 23(1)    | 7(1)     | 4(1)     | -9(1)    |
| O(4)  | 18(1)    | 37(1)    | 27(1)    | 8(1)     | 5(1)     | -4(1)    |
| N(1)  | 12(1)    | 16(1)    | 15(1)    | 0(1)     | 3(1)     | 0(1)     |
| N(2)  | 12(1)    | 17(1)    | 13(1)    | 0(1)     | 4(1)     | 0(1)     |
| N(3)  | 17(1)    | 17(1)    | 13(1)    | 1(1)     | 4(1)     | -1(1)    |
| N(4)  | 13(1)    | 12(1)    | 14(1)    | 1(1)     | 2(1)     | 1(1)     |
| N(5)  | 22(1)    | 25(1)    | 14(1)    | 4(1)     | 0(1)     | -8(1)    |
| C(1)  | 18(1)    | 21(1)    | 17(1)    | -2(1)    | 2(1)     | 1(1)     |
| C(2)  | 31(1)    | 24(1)    | 18(1)    | 6(1)     | 2(1)     | 7(1)     |
| C(3)  | 32(1)    | 18(1)    | 27(1)    | 6(1)     | 6(1)     | 6(1)     |
| C(4)  | 24(1)    | 16(1)    | 23(1)    | -1(1)    | 5(1)     | 1(1)     |
| C(5)  | 13(1)    | 15(1)    | 18(1)    | -2(1)    | 4(1)     | 1(1)     |
| C(6)  | 17(1)    | 15(1)    | 14(1)    | -4(1)    | 3(1)     | -1(1)    |
| C(7)  | 15(1)    | 17(1)    | 15(1)    | -1(1)    | 1(1)     | -2(1)    |
| C(8)  | 13(1)    | 20(1)    | 17(1)    | -1(1)    | 1(1)     | 2(1)     |
| C(9)  | 13(1)    | 23(1)    | 18(1)    | -1(1)    | 6(1)     | -1(1)    |
| C(10) | 17(1)    | 19(1)    | 15(1)    | 2(1)     | 6(1)     | -2(1)    |
| C(11) | 20(1)    | 26(1)    | 18(1)    | 2(1)     | 5(1)     | 4(1)     |
| C(12) | 31(1)    | 20(1)    | 19(1)    | -3(1)    | 10(1)    | 2(1)     |
| C(13) | 26(1)    | 21(1)    | 14(1)    | -4(1)    | 5(1)     | -7(1)    |
| C(14) | 18(1)    | 21(1)    | 16(1)    | 1(1)     | 5(1)     | -4(1)    |
| C(15) | 14(1)    | 20(1)    | 12(1)    | 1(1)     | 3(1)     | 1(1)     |
| C(16) | 17(1)    | 17(1)    | 16(1)    | 4(1)     | 3(1)     | 1(1)     |
| C(17) | 12(1)    | 15(1)    | 18(1)    | 2(1)     | 3(1)     | -2(1)    |
| C(18) | 24(1)    | 14(1)    | 25(1)    | -1(1)    | 9(1)     | 1(1)     |
| C(19) | 29(1)    | 13(1)    | 26(1)    | 3(1)     | 7(1)     | -1(1)    |

|       |       |       |       |       |       |       |
|-------|-------|-------|-------|-------|-------|-------|
| C(20) | 16(1) | 17(1) | 16(1) | 5(1)  | 1(1)  | -4(1) |
| C(21) | 19(1) | 18(1) | 20(1) | 4(1)  | 7(1)  | 2(1)  |
| C(22) | 21(1) | 11(1) | 23(1) | 2(1)  | 8(1)  | 1(1)  |
| Cu(3) | 13(1) | 13(1) | 13(1) | 1(1)  | 1(1)  | 1(1)  |
| Cu(4) | 13(1) | 12(1) | 16(1) | 2(1)  | 2(1)  | 0(1)  |
| Cl(2) | 19(1) | 16(1) | 25(1) | 5(1)  | 2(1)  | -3(1) |
| S(2)  | 14(1) | 12(1) | 14(1) | 3(1)  | 4(1)  | 3(1)  |
| O(5)  | 19(1) | 15(1) | 25(1) | 4(1)  | 10(1) | 2(1)  |
| O(6)  | 20(1) | 18(1) | 14(1) | 2(1)  | 1(1)  | 5(1)  |
| O(7)  | 25(1) | 34(1) | 38(1) | 2(1)  | 17(1) | 7(1)  |
| O(8)  | 30(1) | 21(1) | 39(1) | -1(1) | 8(1)  | 12(1) |
| N(6)  | 13(1) | 15(1) | 15(1) | 2(1)  | 3(1)  | 0(1)  |
| N(7)  | 12(1) | 14(1) | 13(1) | 0(1)  | 3(1)  | 2(1)  |
| N(8)  | 15(1) | 15(1) | 14(1) | 0(1)  | 3(1)  | 2(1)  |
| N(9)  | 12(1) | 12(1) | 13(1) | 2(1)  | 1(1)  | 0(1)  |
| N(10) | 18(1) | 25(1) | 20(1) | -4(1) | 2(1)  | 5(1)  |
| C(23) | 19(1) | 19(1) | 17(1) | 3(1)  | 1(1)  | -3(1) |
| C(24) | 30(1) | 21(1) | 17(1) | -3(1) | 4(1)  | -7(1) |
| C(25) | 29(1) | 14(1) | 26(1) | -2(1) | 6(1)  | -2(1) |
| C(26) | 23(1) | 16(1) | 21(1) | 4(1)  | 3(1)  | 0(1)  |
| C(27) | 12(1) | 16(1) | 17(1) | 3(1)  | 3(1)  | 0(1)  |
| C(28) | 17(1) | 15(1) | 15(1) | 3(1)  | 3(1)  | 3(1)  |
| C(29) | 15(1) | 16(1) | 16(1) | 1(1)  | 1(1)  | 5(1)  |
| C(30) | 13(1) | 18(1) | 15(1) | 2(1)  | 1(1)  | 0(1)  |
| C(31) | 13(1) | 22(1) | 17(1) | 2(1)  | 4(1)  | 3(1)  |
| C(32) | 16(1) | 18(1) | 13(1) | -2(1) | 4(1)  | 2(1)  |
| C(33) | 18(1) | 25(1) | 21(1) | 1(1)  | 5(1)  | -2(1) |
| C(34) | 27(1) | 22(1) | 22(1) | 4(1)  | 9(1)  | -2(1) |
| C(35) | 23(1) | 19(1) | 15(1) | 3(1)  | 5(1)  | 5(1)  |
| C(36) | 16(1) | 20(1) | 14(1) | -2(1) | 4(1)  | 3(1)  |
| C(37) | 15(1) | 19(1) | 13(1) | -1(1) | 3(1)  | 2(1)  |
| C(38) | 15(1) | 14(1) | 16(1) | -2(1) | 1(1)  | 2(1)  |
| C(39) | 13(1) | 14(1) | 15(1) | -1(1) | 2(1)  | 2(1)  |
| C(40) | 20(1) | 15(1) | 20(1) | 3(1)  | 7(1)  | 0(1)  |
| C(41) | 24(1) | 13(1) | 25(1) | 3(1)  | 5(1)  | 4(1)  |
| C(42) | 14(1) | 18(1) | 17(1) | -4(1) | 2(1)  | 4(1)  |

|       |       |       |       |      |      |      |
|-------|-------|-------|-------|------|------|------|
| C(43) | 15(1) | 17(1) | 16(1) | 0(1) | 4(1) | 0(1) |
| C(44) | 16(1) | 11(1) | 17(1) | 2(1) | 2(1) | 1(1) |

---

**Table D.3.5.** Hydrogen coordinates ( $\times 10^4$ ) and isotropic displacement parameters ( $\text{\AA}^2 \times 10^{-3}$ ) for Cu(PENAEA)-CuCl.

|        | x     | y     | z    | U(eq) |
|--------|-------|-------|------|-------|
| H(1B)  | 1219  | 7104  | 80   | 23    |
| H(2B)  | 1236  | 9094  | -191 | 29    |
| H(3A)  | 2073  | 10770 | 410  | 30    |
| H(4A)  | 2912  | 10377 | 1262 | 25    |
| H(6A)  | 2159  | 7842  | 1838 | 19    |
| H(6B)  | 3319  | 9013  | 1913 | 19    |
| H(7A)  | 5092  | 7588  | 1566 | 19    |
| H(7B)  | 4846  | 7491  | 2147 | 19    |
| H(8A)  | 5005  | 4431  | 1647 | 20    |
| H(8B)  | 6096  | 5625  | 1835 | 20    |
| H(9A)  | 5470  | 6213  | 938  | 21    |
| H(9B)  | 6677  | 5183  | 1051 | 21    |
| H(11A) | 6391  | 3390  | 486  | 26    |
| H(12A) | 4925  | 2091  | -161 | 28    |
| H(13A) | 2369  | 2484  | -399 | 25    |
| H(14A) | 1337  | 4069  | 48   | 22    |
| H(15A) | 2580  | 6185  | 2233 | 18    |
| H(15B) | 3999  | 5355  | 2374 | 18    |
| H(16A) | 2836  | 3711  | 1802 | 20    |
| H(16B) | 1723  | 4099  | 2200 | 20    |
| H(18A) | -367  | 965   | 1345 | 25    |
| H(19A) | -2146 | -45   | 1761 | 27    |
| H(21A) | -3525 | 3289  | 2263 | 22    |
| H(22A) | -1763 | 4293  | 1838 | 22    |
| H(23A) | 3833  | 12161 | 4904 | 22    |
| H(24A) | 3651  | 14213 | 5178 | 28    |
| H(25A) | 2860  | 15638 | 4572 | 28    |
| H(26A) | 2241  | 14916 | 3707 | 24    |
| H(28A) | 3174  | 12196 | 3154 | 18    |
| H(28B) | 2103  | 13322 | 3043 | 18    |
| H(29A) | 135   | 12012 | 3349 | 19    |
| H(29B) | 494   | 11676 | 2783 | 19    |



|        |       |       |      |    |
|--------|-------|-------|------|----|
| H(30A) | 51    | 8838  | 3318 | 18 |
| H(30B) | -951  | 9939  | 3113 | 18 |
| H(31A) | -331  | 10906 | 4004 | 21 |
| H(31B) | -1611 | 9821  | 3889 | 21 |
| H(33A) | -1503 | 8304  | 4485 | 25 |
| H(34A) | -167  | 7292  | 5153 | 27 |
| H(35A) | 2433  | 7770  | 5394 | 22 |
| H(36A) | 3613  | 9139  | 4933 | 20 |
| H(37A) | 2647  | 10373 | 2741 | 18 |
| H(37B) | 1179  | 9462  | 2596 | 18 |
| H(38A) | 2199  | 8082  | 3190 | 18 |
| H(38B) | 3379  | 8320  | 2806 | 18 |
| H(40A) | 5604  | 5638  | 3840 | 22 |
| H(41A) | 7485  | 4569  | 3489 | 25 |
| H(43A) | 8297  | 7527  | 2692 | 19 |
| H(44A) | 6470  | 8617  | 3067 | 17 |

---

|        | Orbital                                                                             |
|--------|-------------------------------------------------------------------------------------|
| LUMO   | 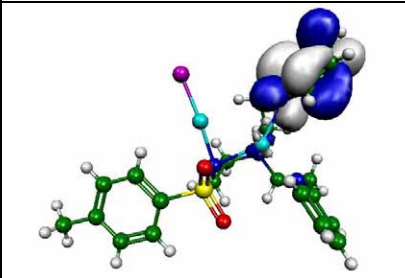   |
| HOMO   |    |
| HOMO-1 |   |
| HOMO-2 |  |
| HOMO-3 |  |

|        |                                                                                                                                                                                                                                                                   |
|--------|-------------------------------------------------------------------------------------------------------------------------------------------------------------------------------------------------------------------------------------------------------------------|
| HOMO-4 | 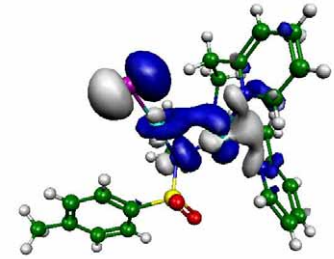 Molecular orbital visualization for HOMO-4. The structure shows a complex arrangement of atoms with a prominent blue lobe on the left side, indicating a high-energy orbital.   |
| HOMO-5 |  Molecular orbital visualization for HOMO-5. The structure shows a complex arrangement of atoms with a prominent blue lobe on the left side, indicating a high-energy orbital.   |
| HOMO-6 |  Molecular orbital visualization for HOMO-6. The structure shows a complex arrangement of atoms with a prominent blue lobe on the left side, indicating a high-energy orbital.  |
| HOMO-7 |  Molecular orbital visualization for HOMO-7. The structure shows a complex arrangement of atoms with a prominent blue lobe on the left side, indicating a high-energy orbital. |
| HOMO-8 |  Molecular orbital visualization for HOMO-8. The structure shows a complex arrangement of atoms with a prominent blue lobe on the left side, indicating a high-energy orbital. |
| HOMO-9 |  Molecular orbital visualization for HOMO-9. The structure shows a complex arrangement of atoms with a prominent blue lobe on the left side, indicating a high-energy orbital. |

HOMO-10

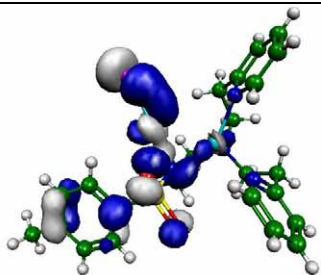

Supplement: b705684b.pdf [file b705684b.pdf]
